# Supplementary material for: Angiogenesis Related Gene Signatures Predict Prognosis and Guide Therapeutic Strategies in Renal Clear Cell Carcinoma
Source: Research Square preprint supplement (doi:10.21203/rs.3.rs-5477867/v1), 2025-04-17
Supplement: Supplementary file 1 [file 4bf1f948fe533ccdcc00ce6f.xlsx]

## Sheet: GSEA gene
ANGIOGENESIS	GOBP_REGULATION_OF_CELL_MIGRATION_INVOLVED_IN_SPROUTING_ANGIOGENESIS	GOBP_NEGATIVE_REGULATION_OF_CELL_MIGRATION_INVOLVED_IN_SPROUTING_ANGIOGENESIS	GOBP_POSITIVE_REGULATION_OF_CELL_MIGRATION_INVOLVED_IN_SPROUTING_ANGIOGENESIS
ACVRL1	AKT3	HDAC5	AKT3
AGGF1	HDAC5	MIR2355	CIB1
AMOT	MIR2355	PDCD10	PLK2
ANG	CIB1	SPRED1	FGF2
ANGPTL3	PLK2	CARD10	FOXC2
ANGPTL4	PDCD10	RHOA	ABL1
ATP5IF1	SPRED1	MIR146A	GATA2
BTG1	FGF2	MIR149	SRPX2
C1GALT1	FOXC2	MIR15A	ANXA1
CANX	ABL1	MIR16-1	HMOX1
CDH13	GATA2	MIR188	KDR
CHRNA7	SRPX2	MIR193A	MIRLET7F1
COL4A2	CARD10	MIR196A1	MIR101-1
COL4A3	ANXA1	MIR199A1	MIR10A
EGF	HMOX1	MIR19B1	MIR10B
EMCN	KDR	MIR20A	MIR126
EPGN	RHOA	MIR200C	MIR132
ERAP1	MIRLET7F1	MIR206	MIR146A
FOXO4	MIR101-1	MIR22	MIR150
HTATIP2	MIR10A	MIR221	MIR23A
IL17F	MIR10B	MIR26A1	MIR27A
IL18	MIR126	MIR29C	MIR27B
CXCL8	MIR132	MIR320A	MIR296
MYH9	MIR146A	MEOX2	MIR31
NCL	MIR149	NOTCH1	MAP3K3
NF1	MIR150	MIR361	HDAC7
NOTCH4	MIR15A	MIR424	PIK3C2A
NPPB	MIR16-1	DLL4	RHOJ
NPR1	MIR188	MAP2K5	PTGS2
PF4	MIR193A	MIR329-1	JCAD
PLG	MIR196A1	MIR410	MIR487B
PML	MIR199A1	MIR494	VEGFA
PROK2	MIR19B1	MIR495	NRP1
RHOB	MIR20A	MIR497	HDAC9
RNH1	MIR200C	MIR503	FGFBP1
ROBO4	MIR206	MIR483
RUNX1	MIR22	TBXA2R
SCG2	MIR221	THBS1
SERPINF1	MIR23A	MMRN2
SHH	MIR26A1	STARD13
SPHK1	MIR27A	ITGB1BP1
SPINK5	MIR27B	KLF4
STAB1	MIR296
TGFB2	MIR29C
THY1	MIR31
TNFSF12	MIR320A
TNNI3	MAP3K3
VEGFA	MEOX2
	NOTCH1
	MIR361
	MIR424
	HDAC7
	PIK3C2A
	DLL4
	FBXW7
	MAP2K5
	RHOJ
	PTGS2
	MIR329-1
	MIR410
	MIR494
	MIR495
	MIR497
	MIR503
	JCAD
	MIR483
	MIR487B
	TBXA2R
	THBS1
	NR2E1
	VEGFA
	MMRN2
	NRP1
	STARD13
	ITGB1BP1
	KLF4
	HDAC9
	FGFBP1

## Sheet: Genecard gene
Integrins in angiogenesis	Angiogenesis (CST)	Angiogenesis (WikiPathways)	SARS-CoV-2 altering angiogenesis via NRP1
ADGRA2	ADAMTS1	AKT1	ACE2
AKT1	ANGPT2	ARNT	FURIN
ANGPTL3	ARNT	CREBBP	KDR
BCAR1	CA9	FGF2	NRP1
CASP8	CCL2	FGFR2	VEGFA
CBL	CDH5	FLT1
CDKN1B	CREBBP	HIF1A
COL11A1	DLL4	KDR
COL11A2	EFNB1	MAPK1
COL1A1	EFNB2	MAPK14
COL1A2	EFNB3	MMP9
COL2A1	EGLN1	NOS3
COL3A1	ENG	PDGFB
COL4A3	EP300	PIK3CA
COL5A1	EPHA2	PLCG1
COL5A2	EPHB1	SMAD1
COL6A1	EPHB2	SRC
COL6A2	ETS1	TEK
COL6A3	F2RL1	TIMP2
COL7A1	F3
CSF1	FGF1
CSF1R	FGF2
EDIL3	FGFR1
F11R	FGFR2
FGF2	FGFR3
FN1	FGFR4
HSP90AA1	FLT1
IGF1R	FLT4
ILK	GREM1
IRS1	HGF
ITGAV	HIF1A
ITGB3	HIF1AN
KDR	HMOX1
MAPK3	ITGA5
MFGE8	ITGA6
PI4KA	ITGAV
PI4KB	ITGB1
PIK3C2A	ITGB3
PIK3CA	ITGB5
PIK3R1	JAG1
PTK2	KDR
PTK2B	MMP13
PTPN11	MMP2
PXN	MMP3
RAC1	MMP7
RHOA	MMP9
ROCK1	MST1R
RPS6KB1	NDRG1
SDC1	NDRG2
SPP1	NDRG3
SRC	NDRG4
TGFBR2	NEO1
TLN1	NOS3
VAV3	NOTCH1
VCL	NOTCH2
VEGFA	NOTCH3
VTN	NOTCH4
	NRP2
	PDGFRA
	PDGFRB
	PDPN
	PECAM1
	PLN
	PROX1
	PTGS2
	PTPN14
	RECK
	REN
	SERPINB5
	SPRY1
	TDGF1
	TEK
	TFCP2
	TGFA
	TGFB1
	TGFB2
	TGFB3
	TGFBR1
	TGFBR3
	THBS1
	TIMP1
	TIMP2
	TIMP3
	TNC
	TYMP
	UNC5B
	VEGFB
	VEGFC
	VWF

## Sheet: Angiogenesis related genes
ABL1
ACE2
ACVRL1
ADAMTS1
ADGRA2
AGGF1
AKT1
AKT3
AMOT
ANG
ANGPT2
ANGPTL3
ANGPTL4
ANXA1
ARNT
ATP5IF1
BCAR1
BTG1
C1GALT1
CA9
CANX
CARD10
CASP8
CBL
CCL2
CDH13
CDH5
CDKN1B
CHRNA7
CIB1
COL11A1
COL11A2
COL1A1
COL1A2
COL2A1
COL3A1
COL4A2
COL4A3
COL5A1
COL5A2
COL6A1
COL6A2
COL6A3
COL7A1
CREBBP
CSF1
CSF1R
CXCL8
DLL4
EDIL3
EFNB1
EFNB2
EFNB3
EGF
EGLN1
EMCN
ENG
EP300
EPGN
EPHA2
EPHB1
EPHB2
ERAP1
ETS1
F11R
F2RL1
F3
FBXW7
FGF1
FGF2
FGFBP1
FGFR1
FGFR2
FGFR3
FGFR4
FLT1
FLT4
FN1
FOXC2
FOXO4
FURIN
GATA2
GREM1
HDAC5
HDAC7
HDAC9
HGF
HIF1A
HIF1AN
HMOX1
HSP90AA1
HTATIP2
IGF1R
IL17F
IL18
ILK
IRS1
ITGA5
ITGA6
ITGAV
ITGB1
ITGB1BP1
ITGB3
ITGB5
JAG1
JCAD
KDR
KLF4
MAP2K5
MAP3K3
MAPK1
MAPK14
MAPK3
MEOX2
MFGE8
MIR101-1
MIR10A
MIR10B
MIR126
MIR132
MIR146A
MIR149
MIR150
MIR15A
MIR16-1
MIR188
MIR193A
MIR196A1
MIR199A1
MIR19B1
MIR200C
MIR206
MIR20A
MIR22
MIR221
MIR2355
MIR23A
MIR26A1
MIR27A
MIR27B
MIR296
MIR29C
MIR31
MIR320A
MIR329-1
MIR361
MIR410
MIR424
MIR483
MIR487B
MIR494
MIR495
MIR497
MIR503
MIRLET7F1
MMP13
MMP2
MMP3
MMP7
MMP9
MMRN2
MST1R
MYH9
NCL
NDRG1
NDRG2
NDRG3
NDRG4
NEO1
NF1
NOS3
NOTCH1
NOTCH2
NOTCH3
NOTCH4
NPPB
NPR1
NR2E1
NRP1
NRP2
PDCD10
PDGFB
PDGFRA
PDGFRB
PDPN
PECAM1
PF4
PI4KA
PI4KB
PIK3C2A
PIK3CA
PIK3R1
PLCG1
PLG
PLK2
PLN
PML
PROK2
PROX1
PTGS2
PTK2
PTK2B
PTPN11
PTPN14
PXN
RAC1
RECK
REN
RHOA
RHOB
RHOJ
RNH1
ROBO4
ROCK1
RPS6KB1
RUNX1
SCG2
SDC1
SERPINB5
SERPINF1
SHH
SMAD1
SPHK1
SPINK5
SPP1
SPRED1
SPRY1
SRC
SRPX2
STAB1
STARD13
TBXA2R
TDGF1
TEK
TFCP2
TGFA
TGFB1
TGFB2
TGFB3
TGFBR1
TGFBR2
TGFBR3
THBS1
THY1
TIMP1
TIMP2
TIMP3
TLN1
TNC
TNFSF12
TNNI3
TYMP
UNC5B
VAV3
VCL
VEGFA
VEGFB
VEGFC
VTN
VWF

## Sheet: DEGs
ADGRA2
ANG
ANGPT2
ANGPTL3
ANGPTL4
ANXA1
CA9
CDH13
CDH5
COL11A1
COL11A2
COL1A1
COL1A2
COL3A1
COL4A2
COL4A3
COL5A1
COL5A2
COL6A1
COL6A2
COL6A3
CSF1
CSF1R
DLL4
EDIL3
EGF
EPGN
ETS1
FGF1
FGFBP1
FGFR2
FLT1
FLT4
FN1
FOXC2
GATA2
GREM1
HIF1A
HMOX1
HTATIP2
ILK
ITGA5
JCAD
KDR
MEOX2
MIR126
MIR221
MMP13
MMP7
MMP9
NDRG1
NDRG2
NOTCH3
NOTCH4
NR2E1
NRP1
NRP2
PDGFRA
PDGFRB
PECAM1
PF4
PLG
PLK2
PML
PROX1
PTGS2
RHOB
RUNX1
SCG2
SERPINF1
SPHK1
SPINK5
SPRY1
STAB1
TDGF1
TEK
TGFA
TGFB1
TGFB3
TGFBR3
TIMP1
TNC
TNNI3
TYMP
UNC5B
VAV3
VEGFA
VEGFC
VWF

## Sheet: Prognosis-related genes
TEK
KDR
VAV3
PROX1
CDH13
SERPINF1
VWF
PECAM1
FLT1
NDRG2
RHOB
CDH5
TIMP1
SPRY1
COL11A1
SPHK1
NDRG1
PLG
FLT4
NOTCH4
TGFBR3
COL6A1
TGFA
ETS1
NRP1
PTGS2
COL5A1
COL6A3
FGF1
RUNX1
JCAD
GATA2
GREM1
COL6A2
MMP9
MMP13
DLL4
ANG
MEOX2
COL4A3
ANGPTL3
COL1A1
PDGFRA
COL4A2
UNC5B
ADGRA2

## Sheet: Risk Model Construction
> summary(multiCox)
coxph(formula = Surv(futime, fustat) ~ MEOX2 + PLG + PROX1 +
TEK + TIMP1, data = lassoSigExp)
gene	coef	exp(coef)	se(coef)	z	Pr(>|z|)	exp(coef)	exp(-coef)	lower .95	upper .95
MEOX2	0.09269	1.09713	0.06303	1.471	0.1414	1.0971	0.9115	0.9696	1.241
PLG	-0.11882	0.88797	0.07978	-1.489	0.13642	1.0971	0.9115	0.9696	1.241
PROX1	0.45291	1.57289	0.09336	4.851	1.23e-06 ***	1.5729	0.6358	1.3099	1.889
TEK	-0.39681	0.67246	0.08477	-4.681	2.86e-06 ***	0.6725	1.4871	0.5695	0.794
TIMP1	0.27982	1.3229	0.09517	2.94	0.00328 **	1.3229	0.7559	1.0978	1.594
Signif. codes: 0 ‘***’ 0.001 ‘**’ 0.01 ‘*’ 0.05 ‘.’ 0.1 ‘ ’ 1
Concordance= 0.73 (se = 0.027 )
Likelihood ratio test= 64.86 on 5 df, p=1e-12
Wald test = 72.56 on 5 df, p=3e-14
Score (logrank) test = 85.79 on 5 df, p=<2e-16

## Sheet: Single-cell cohort 
GSMID	Single cell Sequencing SI_ID	Age	Sex	Disease Type	Cancer Type
GSM4819725	SI_18854	71	Male	Tumor	Clear Cell RCC
GSM4819727	SI_18855	70	Male	Tumor	Clear Cell RCC
GSM4819726	SI_18856	70	Male	Normal
GSM4819729	SI_19703	69	Male	Tumor	Clear Cell RCC
GSM4819728	SI_19704	69	Male	Normal
GSM4819730	SI_21255	65	Female	Normal Cortex
GSM4819731	SI_21256	65	Female	Normal Medulla
GSM4819732	SI_21561	43	Female	Tumor	Chromophobe RCC
GSM4819734	SI_22368	76	Male	Tumor	Clear Cell RCC
GSM4819733	SI_22369	76	Male	Normal Cortex
GSM4819736	SI_22604	74	Male	Tumor	Clear Cell RCC
GSM4819735	SI_22605	74	Male	Normal
GSM4819737	SI_23459	66	Male	Tumor	Clear Cell RCC
GSM4819738	SI_23843	71	Male	Tumor	Clear Cell RCC
